# Supplementary material
Source: publisher figshare collection journal article supplement (https://acs.figshare.com/ndownloader/files/3943357)
Supplement: Supplementary file 1 [file 3943357]

## SUPPORTING INFORMATION

### Automatic Registration of Mass Spectrometry Imaging Datasets to the Allen Brain Atlas

Walid M. Abdelmoula<sup>1,\*</sup>, Ricardo J. Carreira<sup>2,\*</sup>, Reinald Shyti<sup>3</sup>, Benjamin Balluff<sup>2</sup>, René J. M. van Zeijl<sup>2</sup>, Else Tolner<sup>3,4</sup>, Boudewijn F.P. Lelieveldt<sup>1,5</sup>, Arn M.J.M. van den Maagdenberg<sup>3,4</sup>, Liam A. McDonnell<sup>2,#</sup>, Jouke Dijkstra<sup>1</sup>

\* equal contributions

<sup>1</sup> Division of Image Processing, Department of Radiology, Leiden University Medical Center, Leiden, the Netherlands

<sup>2</sup> Center for Proteomics and Metabolomics, Leiden University Medical Center, Leiden, the Netherlands

<sup>3</sup> Department of Human Genetics, Leiden University Medical Center, Leiden, the Netherlands

<sup>4</sup> Department of Neurology, Leiden University Medical Center, Leiden, the Netherlands

<sup>5</sup> Intelligent Systems Group, faculty of EEMCS, Delft University of Technology, Delft, the Netherlands

# Corresponding authors and reprint requests

Dr. Liam A. McDonnell, Center for Proteomics and Metabolomics, Leiden University Medical Center, Einthovenweg 20, 2333 ZC Leiden, The Netherlands; E-mail: L.A.Mcdonnell@lumc.nl; Phone: +31 71 526 8744; Fax: +31 71 526 6907

### Table of contents

**Figure S-1:** Evaluation of the best reference selection from the ABA's ROI..... S-2

**Figure S-2:** Quantitative estimation of the performance of the registration process..... S-4

**Supporting file 1:** registration parameters.txt

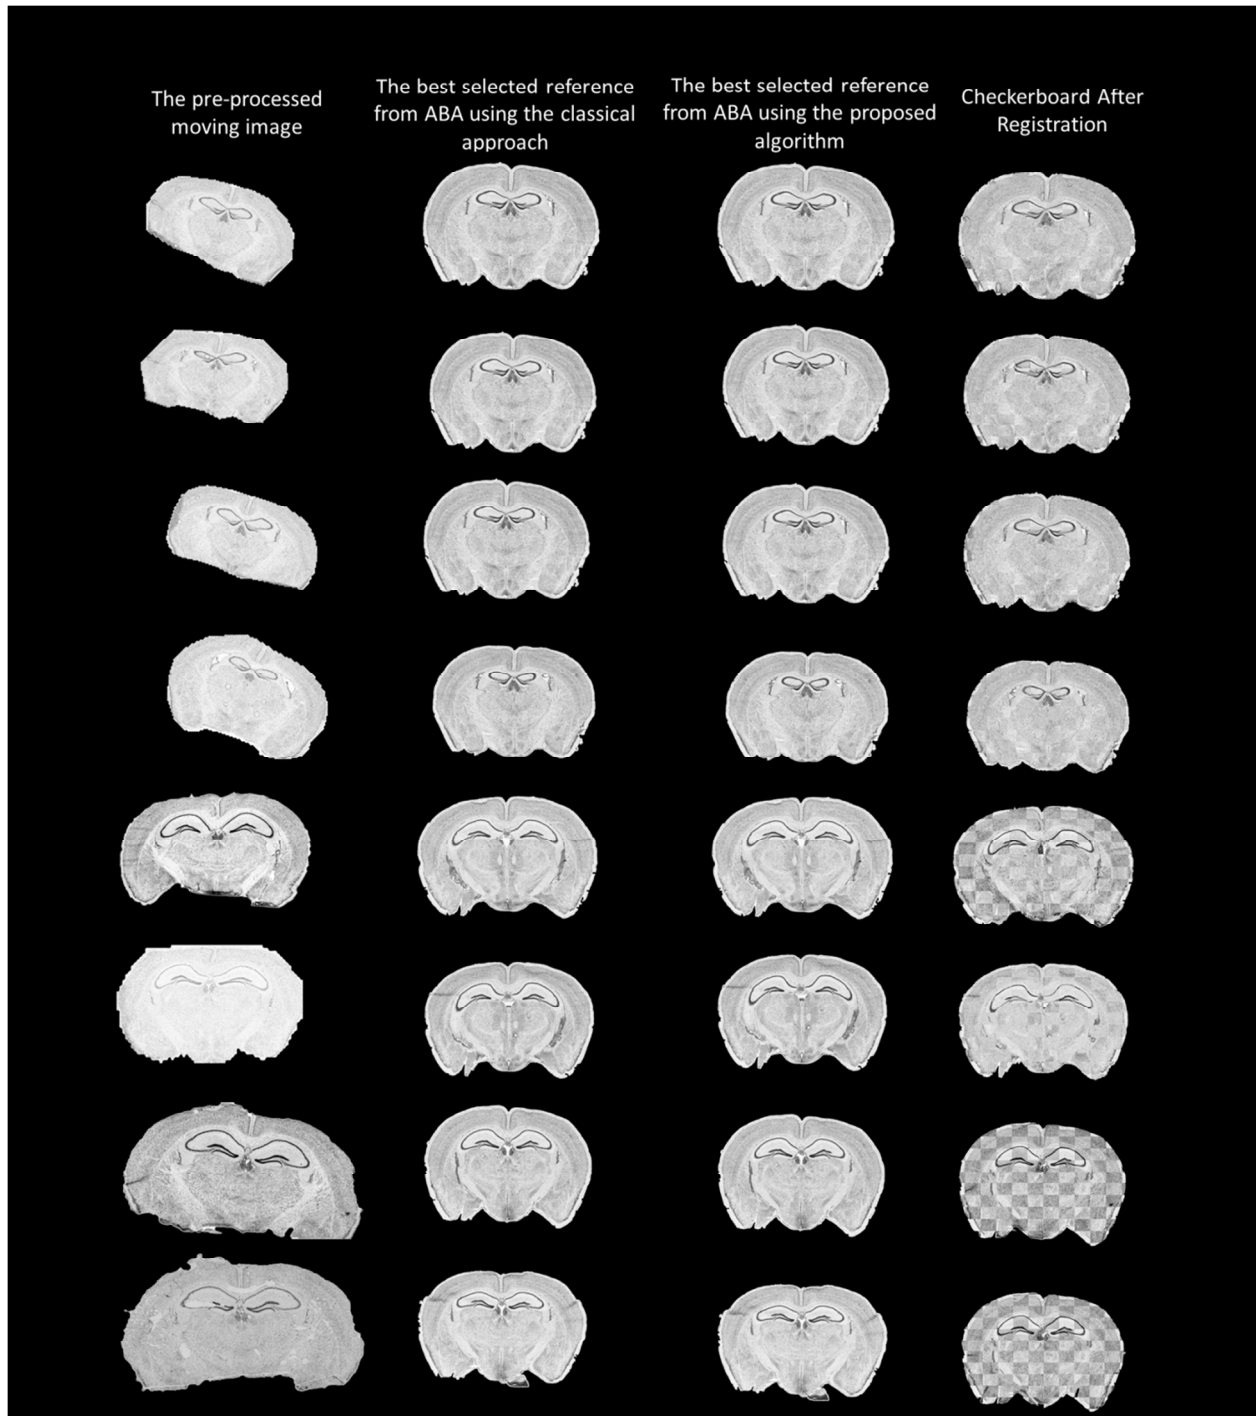

**Figure S-1:** Evaluation of the best reference selection from the ABA's ROI. The evaluation of the proposed algorithm to select the best reference section from the extracted region of interest (ROI) from the Allen Brain Atlas was done by comparison to the classical computationally expensive approach. In the classical approach, the given experimental section is registered to each of those 14 images of the ROI and the image with the best similarity measure is selected as the best reference. As the entire search space of the ROI is considered in this approach, then the

best selected reference is considered as the ground truth, however, this is a computationally expensive method. To reduce the computational complexity of the classical approach, we proposed a novel algorithm (See section 3.1 in the manuscript) in which the search space was effectively reduced to 3 instead of 14 images. A test set of 8 coronal sections from 8 mice was used to test the algorithm. The results were promising since the accuracy achieved with the new algorithm was the same as with the classical approach but 4X faster.

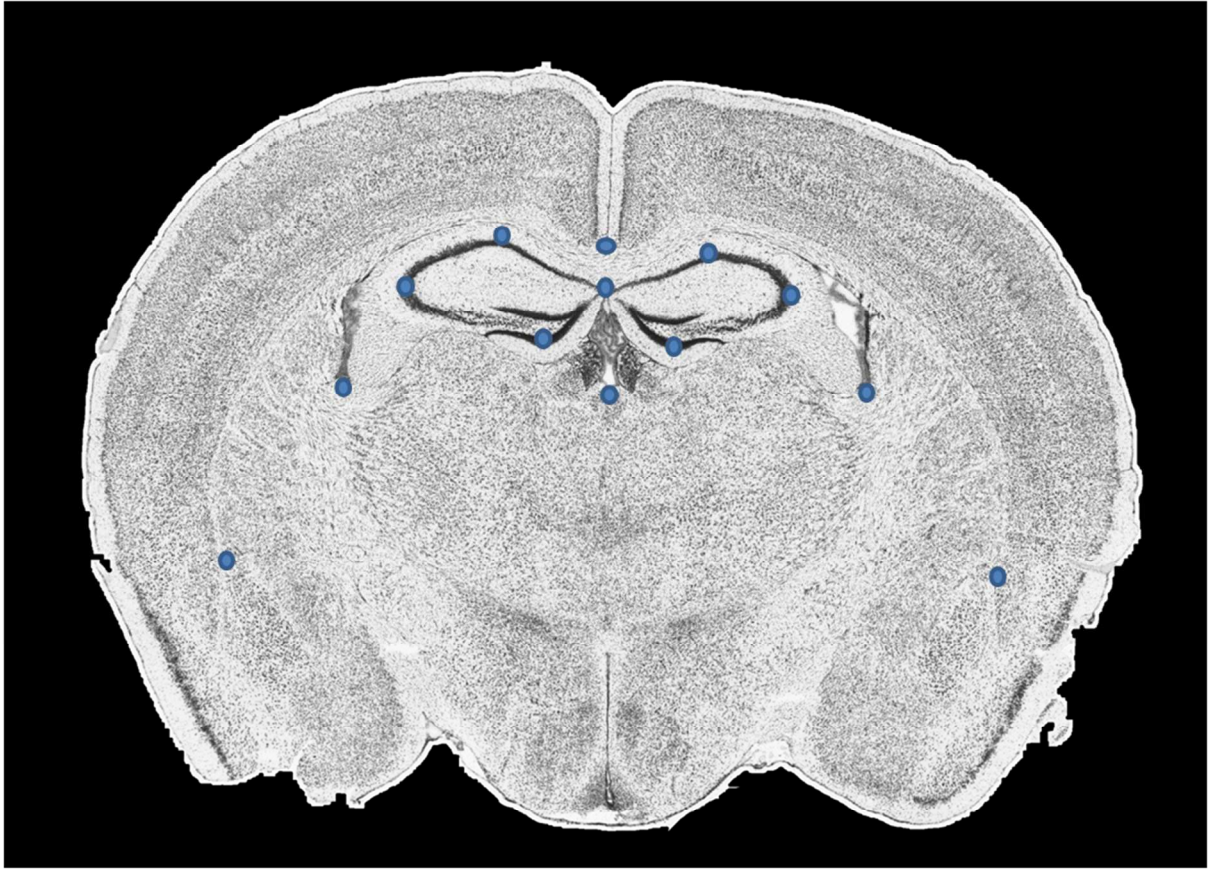

**Figure S-2:** Quantitative estimation of the performance of the registration process. A series of control points were used to calculate the Euclidian distances before and after registration.
